# Supplementary material
Source: publisher figshare collection journal article supplement (https://frontiersin.figshare.com/ndownloader/files/31567664)
Supplement: Supplementary file [file 31567664]

## Supplementary Material

### SUPPLEMENTARY FIGURES

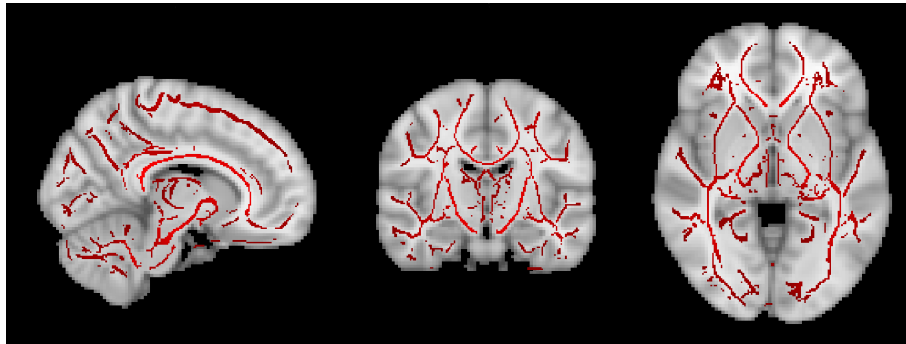

**Figure S1.** FMRIB58\_FA standard-space image (red) overlaid onto the MNI152 standard-space image. The FA and MD values were mapped to the standard-space white matter fiber locations shown in red.

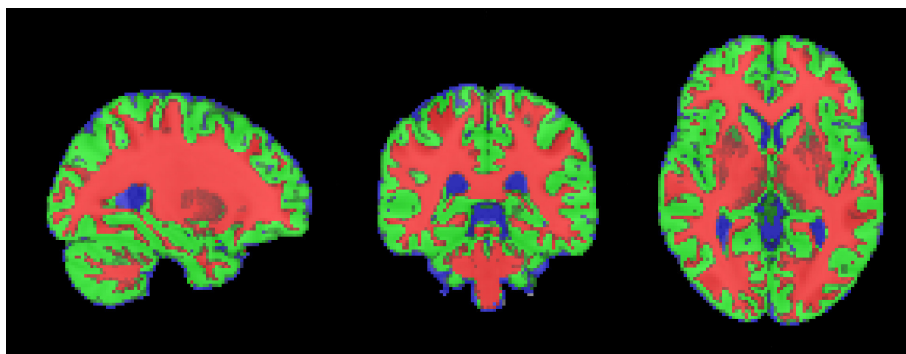

**Figure S2.** Structural image segmentation showing probability of tissue types in voxels. Red color - white matter, green color - gray matter, and blue color - cerebrospinal fluid. The opacity of each channel was set to 0.5, and probability was thresholded at 0.5 for better contrast in FSLeys.

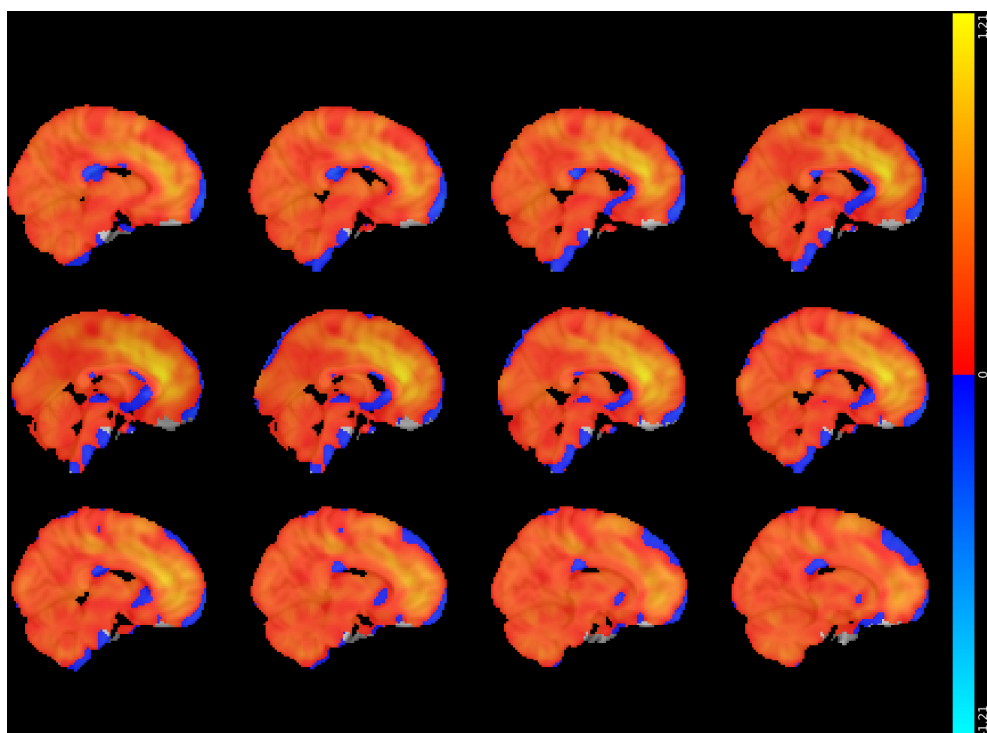

**Figure S3.** Sagittal views of the brain showing Pearson resting-state seed-based correlation values for anterior cingulate cortex. The color bar to the right of the figure shows the correlation values.

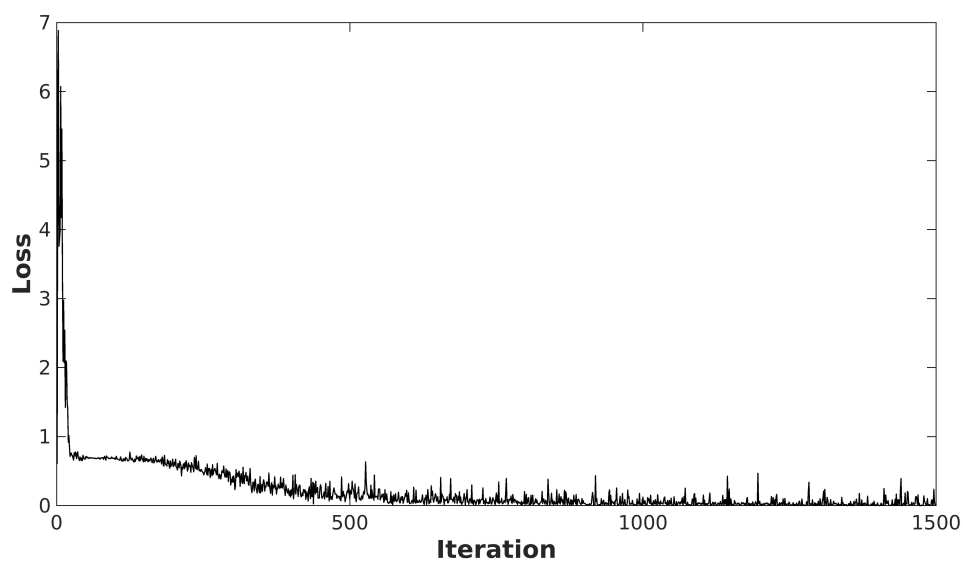

**Figure S4.** A typical training curve for the 3D CNN rs-fMRI model for 50 epochs.

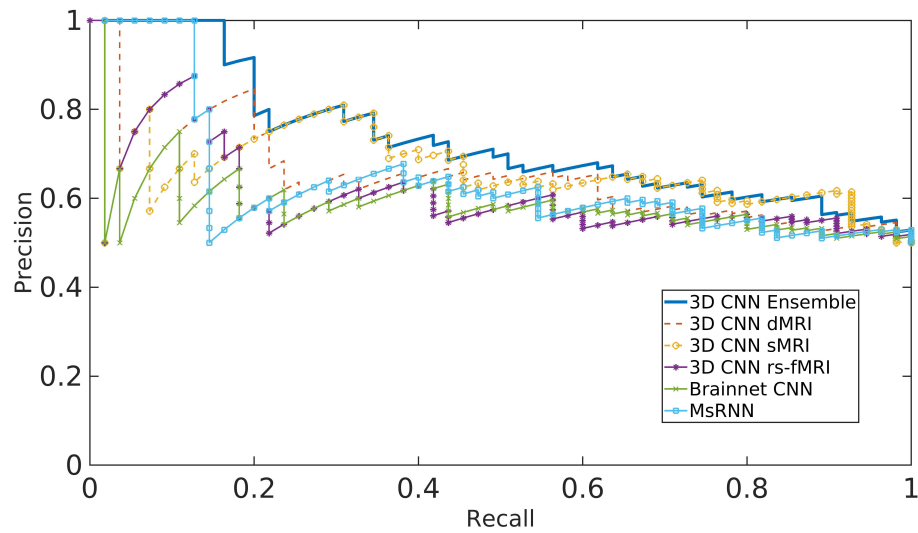

**Figure S5.** Precision-Recall curves for the different methods for classifying children with DBDs and TD controls.
